# Supplementary material for: Acetylation of BMAL1 by TIP60 controls BRD4-P-TEFb recruitment to circadian promoters
Source: eLife. 2019 Jul 11;8:e43235. doi: 10.7554/eLife.43235 (PMC6650244; doi:10.7554/eLife.43235)
Supplement: Supplementary file 3. [file elife-43235-supp3.xlsx]

## Sheet: Template
Key Resources Table
Reagent type (species) or resource	Designation	Source or reference	Identifiers	Additional information
strain, strain background (E. coli)	EL 350	NCI at Frederick	N/A
genetic reagent (M. musculus)	Rosa26Flpe/Flpe: Gt(ROSA)26Sortm1(FLP1)Dym	The Jackson Laboratory	JAX: 003946 RRID:IMSR_JAX:003946
genetic reagent (M. musculus)	CMV-Cre: Tg(CMV-cre)1Cgn	The Jackson Laboratory	JAX: 006054 RRID:IMSR_JAX:006054
genetic reagent (M. musculus)	Syt10Cre/Cre	(Husse et al., 2011)	N/A
genetic reagent (M. musculus)	Syt10Cre/+	(Husse et al., 2011)	N/A
genetic reagent (M. musculus)	Tip60fl/fl	This study	N/A	Materials and Methods subsection Tip60 Targeting Vector and Generation of Experimental Animals
genetic reagent (M. musculus)	Tip60fl/-	This study	N/A	Materials and Methods subsection Tip60 Targeting Vector and Generation of Experimental Animals
genetic reagent (M. musculus)	Tip60+/-	This study	N/A	Materials and Methods subsection Tip60 Targeting Vector and Generation of Experimental Animals
genetic reagent (M. musculus)	Syt10Cre/+ Tip60fll-	This study	N/A	Materials and Methods subsection Tip60 Targeting Vector and Generation of Experimental Animals
genetic reagent (M. musculus)	Syt10Cre/Cre Tip60fll-	This study	N/A	Materials and Methods subsection Tip60 Targeting Vector and Generation of Experimental Animals
cell line (M. musculus)	NIH 3T3 Bmal1-LUC	(Nagoshi et al., 2004)	N/A
cell line (M. musculus)	NIH 3T3 Bmal1-LUC; Bmal1K538R	This study	N/A	Materials and Methods subsection Generation of Bmal1K538R mutant cells
cell line (M. musculus)	Tip60fl/- MEFs	This study	N/A	Materials and Methods subsection Transfection and Viral Transduction
cell line (M. musculus)	Tip60fl/- Bmal1-LUC MEFs	This study	N/A	Materials and Methods subsection Transfection and Viral Transduction
cell line (M. musculus)	Tip60fl/- Bmal1-LUC; Tip60-V5 MEFs	This study	N/A	Materials and Methods subsection Transfection and Viral Transduction
cell line (M. musculus)	Tip60fl/- Bmal1-LUC; Tip60 C369A;E403Q-V5 MEFs	This study	N/A	Materials and Methods subsection Transfection and Viral Transduction
cell line (M. musculus)	Clock+/+ MEFs	M. P. Antoch (UB)	N/A
cell line (M. musculus)	Clock-/- MEFs	M. P. Antoch (UB)	N/A
cell line (M. musculus)	Bmal1+/+ MEFs	M. P. Antoch (UB)	N/A
cell line (M. musculus)	Bmal1-/- MEFs	M. P. Antoch (UB)	N/A
cell line (H. sapiens)	HEK239T	ATCC	CRL-3216 RRID:CVCL_0063
antibody	Rabbit monoclonal anti-BRD4	Bethyl	Cat# A301-985A RRID:AB_1576498	WB (1:1000)
antibody	Rabbit polyclonal anti-CDK9	Santa Cruz Biotechnology	Cat# sc-484 RRID:AB_2275986	WB (1:200)
antibody	Mouse monoclonal anti-CDK9 (D-7)	Santa Cruz Biotechnology	Cat# sc-13130 RRID:AB_627245
antibody	Mouse monoclonal anti-Pol II CTD	BIOZOL	Cat# MABI0601 RRID:AB_2728735
antibody	Rat monoclonal anti-RNA polymerase II subunit B1 (phospho CTD Ser-2), clone 3E10	Millipore	Cat# 04-1571 RRID:AB_11212363
antibody	Rabbit polyclonal anti-TFIIE alpha	Santa Cruz Biotechnology	Cat# sc-28177 RRID:AB_778322
antibody	Rabbit polyclonal anti-BMAL1	Novus	Cat# NB100-2288 RRID:AB_10000794	WB (1:1000)
antibody	Rabbit polyclonal anti-acetyl BMAL1 (Lys538)	Millipore	Cat# AB15396 RRID:AB_11212017	WB (1:250)
antibody	Rabbit polyclonal anti-TIP60	J. Lough (MCW)	N/A	WB (1:500)
antibody	Rabbit polyclonal anti-TIP60	B. Amati (IEO)	CLHF	IHC (1:500), WB (1:1000)
antibody	Mouse monoclonal anti-TBP (HRP)	Abcam	Cat# ab197874 RRID:AB_945758	WB (1:3000)
antibody	Mouse monoclonal anti-FLAG M2 (HRP)	Sigma-Aldrich	Cat# A8592 RRID:AB_439702	WB (1:1000)
antibody	Mouse monoclonal anti-V5 (HRP)	Thermo Fisher Scientific	Cat# R961-25 RRID:AB_2556565	WB (1:2000)
antibody	Mouse monoclonal anti-myc (HRP)	Thermo Fisher Scientific	Cat# R951-25 RRID:AB_2556561	WB (1:3000)
antibody	Mouse monoclonal anti-GST (HRP)	GE Healthcare	Cat# RPN1236 RRID:AB_771429	WB (1:1000)
antibody	Goat polyclonal anti-Actin (I-19) (HRP)	Santa Cruz Biotechnology	Cat# sc-1616-HRP AB_630836	WB (1:1000)
antibody	Rabbit polyclonal anti-acetylated Lysine	Cell Signaling Technology	Cat# 9441S RRID:AB_331805	WB (1:500)
antibody	Goat polyclonal anti-Rabbit IgG (HRP)	Cell Signaling Technology	Cat# 7074 RRID:AB_2099233	WB (1:3000)
antibody	Mouse monoclonal anti-Rabbit IgG (Conformation Specific) (HRP)	Cell Signaling Technology	Cat# 5127S RRID:AB_10892860	WB (1:2000)
antibody	Goat polyclonal anti-Rabbit IgG (Alexa Fluor 488)	Thermo Fisher Scientific	Cat# A-11034 RRID:AB_2576217	WB (1:500)
antibody	Rabbit IgG	Thermo Fisher Scientific	Cat# 02-6102 RRID:AB_2532938
antibody	Rat IgG	Thermo Fisher Scientific	Cat# 02-9602 RRID:AB_2532969
recombinant DNA reagent	pL451	NCI at Frederick	N/A
recombinant DNA reagent	pL452	NCI at Frederick	N/A
recombinant DNA reagent	TIP60 BAC	Wellcome Trust Sanger Institute	bMQ-331N14
recombinant DNA reagent	TIP60 targeting construct	This study	N/A
recombinant DNA reagent	pSpCas9(BB)-2A-Puro (PX459)	Addgene	Addgene Plasmid #48139
recombinant DNA reagent	pcDNA3.1/TIP60-V5	This study	N/A
recombinant DNA reagent	pcDNA3.1/TIP60C369A;E403Q-V5	This study	N/A
recombinant DNA reagent	pcDNA3.1/BMAL1-myc	This study	N/A
recombinant DNA reagent	pcDNA3.1/BMAL1K538R-myc	This study	N/A
recombinant DNA reagent	Bmal1-FLAG	M.J. Rossner (LMU Munich)	N/A
recombinant DNA reagent	Myc-Clock	P. Sassone-Corsi (UC Irvine)	N/A
recombinant DNA reagent	myc-Clock-mutA	P. Sassone-Corsi (UC Irvine)	N/A
recombinant DNA reagent	pLenti PGK Hygro DEST (w530-1)	Addgene	Addgene Plasmid #19066
recombinant DNA reagent	pLenti PGK Tip60-V5	This study	N/A
recombinant DNA reagent	pLenti PGK TIP60C369A;E403Q-V5	This study	N/A
recombinant DNA reagent	pLV6-Bmal1-dLuc	S.A. Kay (USC)	N/A
recombinant DNA reagent	pBABE-puro SV40 LT	Addgene	Addgene Plasmid #13970
recombinant DNA reagent	pCL-Eco	Addgene	Addgene Plasmid #12371
recombinant DNA reagent	pMD2.G	Addgene	Addgene Plasmid #12259
recombinant DNA reagent	psPAX2	Addgene	Addgene Plasmid #12260
recombinant DNA reagent	Ad5-CMV-GFP	Vector Development lab	N/A
recombinant DNA reagent	Ad5-CMV-Cre-GFP	Vector Development lab	N/A
sequence-based reagent	BMAL1 sgRNA	This study	N/A	CCTCCGTTCTTCCATTCGTA
sequence-based reagent	BMAL1 ssDNA	This study	N/A	GCTCCAGCCCATTGAACATCACGAGTACGCCTCCCCCTGATGCCTCTTCTCCAGGcGGacAGAAGGTAAGACTGATGATTCTTAGCCTAAGCTAGAGAACCTCTTGCCCAAGATCTGAAA
sequence-based reagent	Per1 ISH	(Oster et al., 2006)	N/A
sequence-based reagent	Bmal1 ISH	(Oster et al., 2006)	N/A
sequence-based reagent	Dbp ISH	(Oster et al., 2003)	N/A
peptide, recombinant protein	GST-BMAL1	Adnova	H00000406-P01
peptide, recombinant protein	GST-TIP60	SignalChem	K314-380G
commercial assay or kit	RNeasy plus Mini Kit	QIAGEN	74134
commercial assay or kit	Maxima H Minus First Strand cDNA Synthesis Kit	Thermo Fisher Scientific	K1652
commercial assay or kit	iQ SYBR Green Supermix	Bio-Rad	170-8885
commercial assay or kit	Lenti-X Concentrator	Clontech	631232
commercial assay or kit	SYTOX AADvanced Dead Cell Stain Kit	Thermo Fisher Scientific	S10349
commercial assay or kit	LookOut Mycoplasma PCR Detection Kit	Sigma-Aldrich	MP0035
commercial assay or kit	In Situ Cell Death Detection Kit	Roche	11684795910
chemical compound, drug	Dexamethasone	Sigma-Aldrich	D4902
chemical compound, drug	JQ1	Cayman Chemical	11187
chemical compound, drug	Flavopiridol Hydrochloride	Santa Cruz Biotechnology	sc-207687
chemical compound, drug	D-Luciferin potassium salt	Synchem	bc219
chemical compound, drug	Polyethylenimine	Sigma-Aldrich	408727
chemical compound, drug	Polybrene (Hexadimethrine bromide)	Sigma-Aldrich	107689
software, algorithm	ImageQuant TL (v.7.0)	GE Healthcare	N/A
software, algorithm	LumiCycle (v.4.02)	Actimetrics	RRID:SCR_014246 http://actimetrics.com/downloads/
software, algorithm	LumiCycle Analysis (v.2.56)	Actimetrics	http://actimetrics.com/downloads/
software, algorithm	ClockLab Data Collection	Actimetrics	RRID:SCR_014309 http://actimetrics.com/downloads/clocklab/
software, algorithm	ClockLab Analysis (v.2.72)	Actimetrics	RRID:SCR_014309 http://actimetrics.com/downloads/clocklab/
software, algorithm	Prism (v.5.03)	GraphPad Software	RRID:SCR_002798 https://www.graphpad.com/scientific-software/prism/
software, algorithm	CFX Manager (v.3.1)	Bio-Rad	http://www.bio-rad.com/de-de/sku/1845000-cfx-manager-software
software, algorithm	BD Accuri C6 Software (v.1.0.264.21)	BD Biosciences	RRID:SCR_014422
software, algorithm	LAS AF	Leica	N/A

## Sheet: Notes
Introduction
The Key Resources Table is designed to highlight the reagents and resources used in a specific study. Please include the genetically modified organisms and strains, cell lines, reagents, and software that are essential to reproduce the results presented. Note that datasets should be included in the datasets section of the submission form.
Please include a completed Key Resources Table at the start of the Materials and Methods section within your article file (this table does not need to be numbered). For consistency, please do not add subheadings to the table. Any references in the Source column should also be included in the list of references. Datasets should be entered within the datasets section of the submission form. A table…
The Key Resources Table does not need to be an exhaustive list of all the materials and resources used (e.g., essential chemicals and standard culture media do not need to be included). Please ensure that the items listed in the table are reported in the Materials and Methods section within the context of their use. We suggest that no more than ten primers and RNA sequences are included in this t…
Guidelines for creation of the Key Resources Table
Some of the constraints below are imposed to allow automated parsing of the table.
Columns (general):
(1) Column order and headings must be preserved.
(2) Columns A-E should not be removed, even if not used.
(3) Columns can be appended (F, G, etc.) for internal use.
Rows (general):
(1) Row titles (preceding the parentheses) must be preserved.
(2) Row one (column headings) should not be removed.
(3) Row 2 (headings with instructions) can be removed.
(4) Order of the rows can be changed.
(5) Clustering of multiple reagents of one type recommended, but is not mandatory.
(6) Reagent types indicated on template that are not used can be removed.
(7) Reagent types not represented in the template: use “other”.
Column A: Reagent type (mandatory)
(1) Row title (preceding parentheses) cannot be changed.
(2) See descriptions of categories in “Reagent categories” section below.
(3) If appropriate, include species within parentheses. Use full genus and full species for first mention; thereafter, initial for genus may be used.
(4) If appropriate, indicate sex after species (within the parentheses); separate by comma, space.
(5) See additional information in the section “Rows (general)” above.
Column B: Symbol/name used in publication (mandatory)
(1) This is a free-text field; there are no formatting constraints, except for separation of multiple entries by semi-colon, space.
(2) Should indicate exactly how the reagent is referred to in the publication. If several designations are used for one reagent, can include more than one entry, separated by semi-colon, space. If one designation has been used to refer to several different reagents, list each reagent separately and include a unique identifier or description parenthetically.
(3) If there is a semi-colon within the designation used, add double quotes around the entire phrase.
(4) Additional defining information can be included parenthetically (if brief).
Columns C: Source (mandatory)
(1) If reagent obtained from a public source, such as a stock center or company, list resource name.
(2) If not obtained from public source, but a published description is available, list the DOI or PMID for the publication.
(3) If reagent newly created in the publication, enter “this paper”.
(4) If none of the above, enter “other” and explain in Additional Information (Column E).
(5) If it is appropriate to indicate both a publication and a lab or researcher that provided the reagent, list the publication in this field and the lab or researcher in Additional Information.
Column D: Identifiers (not mandatory; use if possible)
(1) Use the format “ID_source:identifier” with a colon and no spaces. Separate multiple entries with a semi-colon, space.
(2) If possible, use the recommended abbreviation for the ID_source (see below).
(3) Multiple identifiers, even if redundant, are useful for validation. In some case a more general identifier (for a stock, for instance) can be combined with a more precise identifier (for the allele of interest in that stock).
(4) Inclusion of database identifiers is strongly encouraged to facilitate accurate incorporation of published data into appropriate biological databases.
Column E: Additional information
(1) Mandatory if column C entry is “this paper” or “other”. Description of new reagent or laboratory from which reagent obtained. (Free text)
(2) For antibodies, indicate dilution in parentheses (to avoid auto-formatting problems).
(3) Other pertinent information, including pointers to supplementary information or Methods section, if appropriate. (Free text)
Additional columns can be added for internal purposes (and removed prior to submission for publication): tracking acquisition by the lab, lab-specific stock numbers, storage location in the lab, comments about problems or QC, etc.
Reagent and resource categories
● Gene (indicate species) - not strictly a reagent, but unambiguous identification critical for genetic research and genetic databases.
● Strain, strain background (indicate species) - applies to whole organism; includes bacterial and virus strains or isolates. Indicate sex, if applicable.
● Genetic reagent (indicate species) - applies to mutations and variants in whole organism, including transgenically introduced constructs. For transgenic lines, indicate host species. Indicate sex, if applicable.
● Cell line (indicate species) - if a primary cell line, describe in Additional Information. Indicate sex, if applicable.
● Transfected construct (indicate species) - in cell line. Generally, indicate species of cell line; use species of construct component if that is more relevant and explain in Additional Information.
● Biological sample (indicate species) - any other biological entity, ranging from isolated tissue to defined population; describe in Additional Information. Indicate sex, if applicable.
● Antibody - include host organism common name and clonality (e.g., “mouse monoclonal”); include dilution used in Additional Information (within parentheses to avoid auto-formatting problems).
● Recombinant DNA reagent - traditional cultured clones, plasmids, cDNAs, etc., including recombinant DNA libraries.
● Sequence-based reagent - oligonucleotides, primers, morpholinos, etc.; indicate sequence.
● Peptide, recombinant protein - generally, commercially available reagents.
● Chemical compound, drug - generally, commercially available reagents.
● Commercial assay, kit - detection assays; labeling and sample preparation kits.
● Software, algorithm - newly created or previously existing.
● Other - miscellaneous other categories, including histological stains.

## Sheet: Example
Reagent type. Duplicate rows as needed. Order is flexible, but row titles must be preserved. Species (mandatory if applicable). Append in parentheses. First mention, use full genus.	Designation. Symbol/name used in publication. Separate multiple entries with semi-colon, space. (If semi-colon within designation, delimit wtith double quotes.)	Source (public). Stock center, company, data repository. Reference. Include PMID or doi; use “this paper” if new. If neither applies enter “other” and explain in Additional Information.	Identifiers. Format as ID_source:identifier. Separate multiple entries with semi-colon, space. Include catalog numbers, stock numbers, database IDs or accession numbers, RRIDs.	Additional information. Mandatory if column C entry is “this paper” or “other”. Description of new reagent; laboratory from which reagent obtained; other pertinent information.
Key Resources Table
Reagent type (species) or resource	Designation	Source or reference	Identifiers	Additional information
gene (Drosophila melanogaster)	nito	NA	FLYB:FBgn0027548
gene (D. melanogaster)	Sxl	NA	FLYB:FBgn0264270
genetic reagent (D. melanogaster)	MTD-Gal4	Bloomington Drosophila Stock Center	BDSC:31777; FLYB:FBtp0001612; RRID:BDSC_31777	FlyBase symbol: P{GAL4-nos.NGT}
genetic reagent (D. melanogaster)	ap-Gal4	Bloomington Drosophila Stock Center	BDSC:3041; FLYB:FBti0002785; RRID:BDSC_3041	FlyBase symbol: P{GawB}ap[md544]
genetic reagent (D. melanogaster)	nub-Gal4	PMID:20798049	FLYB:FBti0016825	FlyBase symbol: P{GawB}nubbin-AC-62
genetic reagent (D. melanogaster)	dome-Gal4	PMID:12403714	FLYB:FBti0022298	FlyBase symbol: P{GawB}dome[PG14]
genetic reagent (D. melanogaster)	UAS-2xEYFP	PMID:12324968	FLYB:FBtp0016537	FlyBase symbol: P{UAS-2xEYFP}
genetic reagent (D. melanogaster)	nito[HP25329]	Bloomington Drosophila Stock Center	BDSC:22092; FLYB:FBal0238892; RRID:BDSC_22092	Genotype: w[1118]; P{w[+mC]=EPg}nito[HP25329]/CyO
genetic reagent (D. melanogaster)	nito[1]	this paper		Progenitor = nito[HP25329]; imprecise excision; lethal
genetic reagent (D. melanogaster)	nito shRNA (HMJ02081)	Bloomington Drosophila Stock Center	TRiP:HMJ02081; BDSC:56852; RRID:BDSC_56852	FlyBase symbol: P{TRiP.HMJ02081}attP40
genetic reagent (D. melanogaster)	nito dsRNA (VDRC 20942)	Vienna Drosophila RNAi Center	VDRC:20942
genetic reagent (D. melanogaster)	FRT[G13]	Bloomington Drosophila Stock Center	BDSC:1956; FLYB:FBti0001247	FlyBase symbol: P{FRT(whs)}G13
genetic reagent (D. melanogaster)	"y w hsflp; ubiGFP FRT[G13]"	PMID:18160348
cell line (D. melanogaster)	S2	other	FLYB:FBtc0000181; RRID:CVCL_Z992	Cell line maintained in N. Perrimon lab; FlyBase symbol: S2-DRSC.
antibody	anti-Nito	this paper		Rabbit polyclonal; against aa 479-500; used YZ3137 (1:500)
antibody	anti-alpha-Spectrin (mouse monoclonal)	Developmental Studies Hybridoma Bank	DSHB:3A9; RRID:AB_528473	(1:10)
antibody	anti-Vasa (rabbit polyclonal)	Santa Cruz Biotechnology	Santa Cruz:sc-30210; RRID:AB_793874	(1:250)
antibody	anti-Sxl (mouse monoclonal)	Developmental Studies Hybridoma Bank	DSHB:M18; RRID:AB_528464	(1:10)
antibody	anti-GFP (rabbit polyclonal)	Molecular Probes	Molecular Probes:A-6455; RRID:AB_221570	(1:1000)
antibody	anti-GFP (mouse monoclonal)	Molecular Probes	Molecular Probes:A-11120; RRID:AB_221568	(1:200)
antibody	anti-HA (rat monoclonal)	Roche	Roche:3F10; RRID:AB_2314622
antibody	Alexa 488- or 555- secondaries	Molecular Probes		(1:1000)
other	DAPI stain	Molecular Probes		(1:1000)
recombinant DNA reagent	pAGW (Gateway vector)	Drosophila Genomics Resource Center	DGRC:1071
recombinant DNA reagent	pAHW (Gateway vector)	Drosophila Genomics Resource Center	DGRC:1095
recombinant DNA reagent	GH11110 (cDNA)	Drosophila Genomics Resource Center	DGRC:5666
recombinant DNA reagent	GFP-Nito (plasmid)	this paper		Progenitors: GH11110 (cDNA); Gateway vector pAGW
recombinant DNA reagent	HA-Sxl (plasmid)	PMID:16207758		Progentiors: PCR, UAS-Sxl flies; Gateway vector pAHW
recombinant DNA reagent	GFP-Sxl (plasmid)	PMID:16207758		Progentiors: PCR, UAS-Sxl flies; Gateway vector pAGW
